# Supplementary material
Source: Springer Nature journal article supplement (https://www.springermedizin.de/resource/supplementary/12889_2010_3380_MOESM2_ESM.pdf/9488922)
Supplement: MOESM2 [file 9488922]

**Table 2 - Mean (SD) for the YSR scores and the gender differences with 95%-confidence intervals.**

| YSR scales              | Female           | Male             | Total            | Gender difference | Confidence interval |
|-------------------------|------------------|------------------|------------------|-------------------|---------------------|
| 1. Withdrawn            | 3.36 (2.45)      | 2.66 (2.26)      | 3.01 (2.38)      | 0.69              | 0.57 – 0.82         |
| 2. Somatic complaints   | 3.75 (2.90)      | 2.11 (2.15)      | 2.93 (2.67)      | 1.64              | 1.50 – 1.77         |
| 3. Anxious/depressed    | 6.78 (4.89)      | 4.40 (3.80)      | 5.59 (4.53)      | 2.38              | 2.15 – 2.61         |
| 4. Social problems      | 1.97 (1.95)      | 2.13 (1.93)      | 2.05 (1.94)      | -0.16             | -0.27 – -0.06       |
| 5. Thought problems     | 1.59 (1.97)      | 1.31 (1.89)      | 1.45 (1.94)      | 0.27              | 0.17 – 0.38         |
| 6. Attention problems   | 4.81 (2.70)      | 4.34 (2.74)      | 4.57 (2.73)      | 0.47              | 0.32 – 0.61         |
| 7. Delinquent behaviour | 4.21 (3.00)      | 4.79 (3.28)      | 4.50 (3.16)      | -0.59             | -0.75 – -0.42       |
| 8. Aggressive behaviour | 8.74 (4.76)      | 8.81 (5.64)      | 8.77 (5.22)      | -0.07             | -0.34 – 0.21        |
| Internalizing problems  | 13.34 (8.11)     | 8.92 (6.47)      | 11.12 (7.66)     | 4.41              | 4.02 – 4.80         |
| Externalizing problems  | 12.95 (6.99)     | 13.60 (8.19)     | 13.27 (7.62)     | -0.65             | -1.06 – -0.25       |
| YSR Total Score         | 40.33<br>(19.26) | 35.35<br>(18.55) | 37.82<br>(19.07) | 4.98              | 3.98 – 5.98         |
